# Supplementary material for: China Precision Nutrition and Health: Knowledge, Attitude, and Practice Real-World Study (CPNAS): A Cross-Sectional Analysis of the Association Between Serum Vitamin A and Homocysteine Levels in Rural Middle-Aged and Elderly Populations in China
Source: Research Square preprint supplement (doi:10.21203/rs.3.rs-8023663/v1), 2025-12-12

**Figure-Supplementary materials**

**Figure 1.Density profiles of vitamin A and homocysteine**


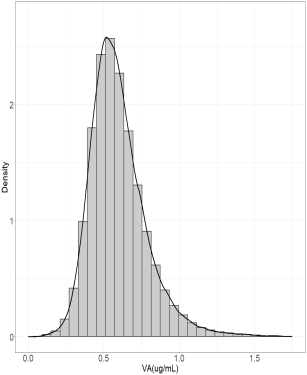

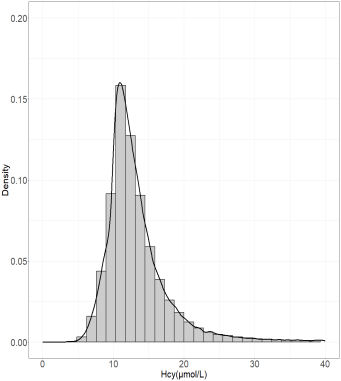


**Figure2.Smooth fitting curve between plasma VA and HCY**

Adjusted for age,sex,BMI,smoking,alcohol,FA,VB12,MTHFRC677T,hypertension,stroke,coronary heart disease


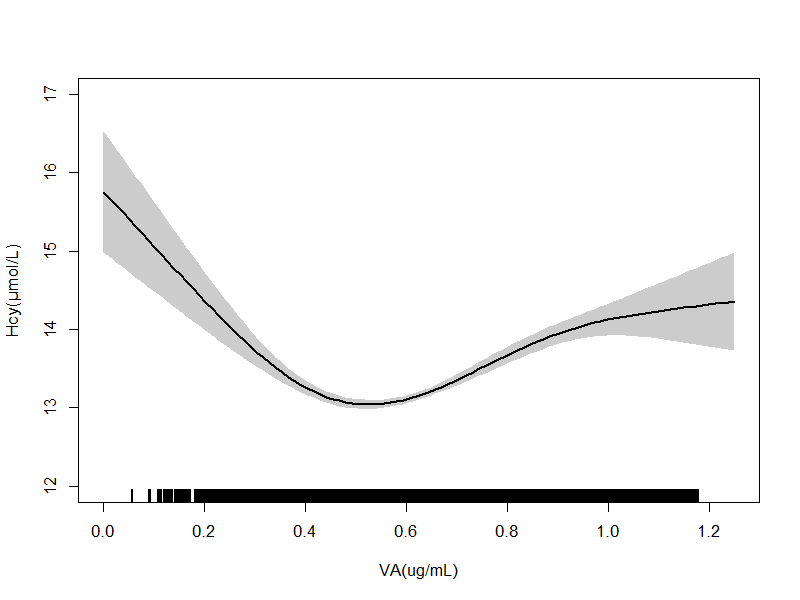

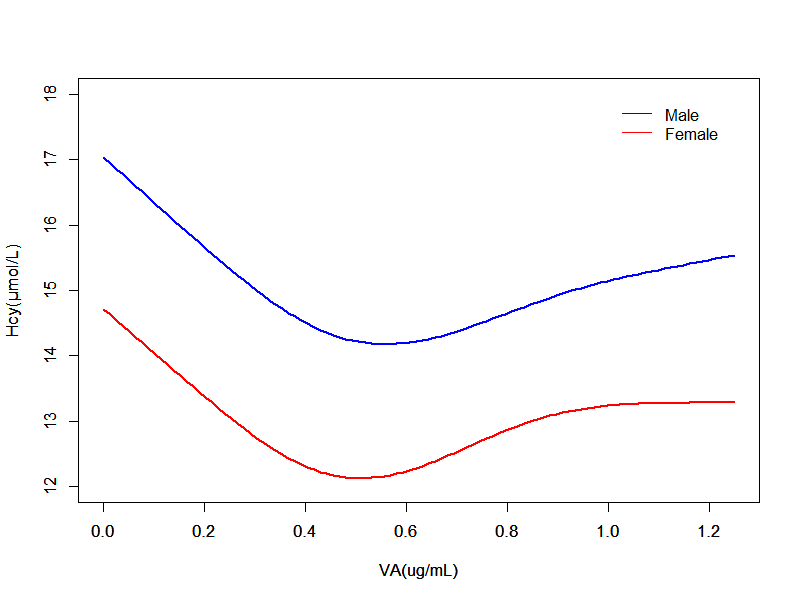

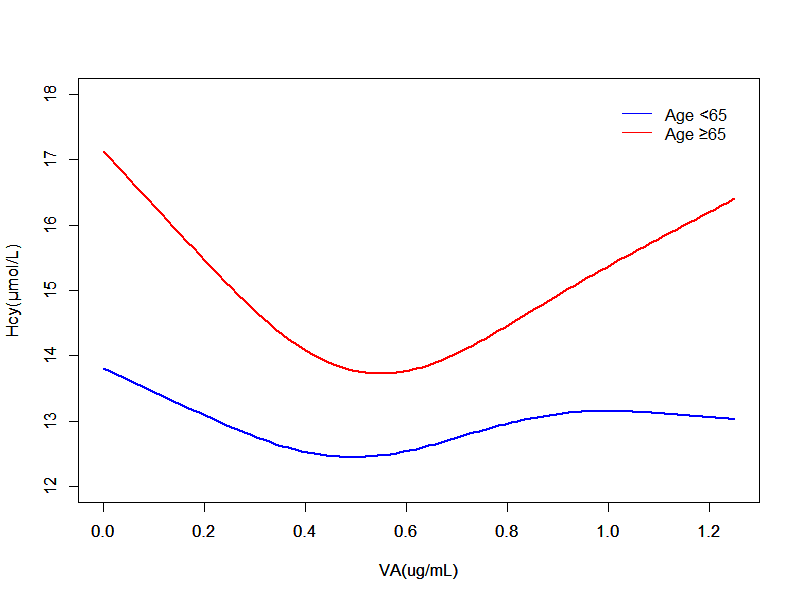

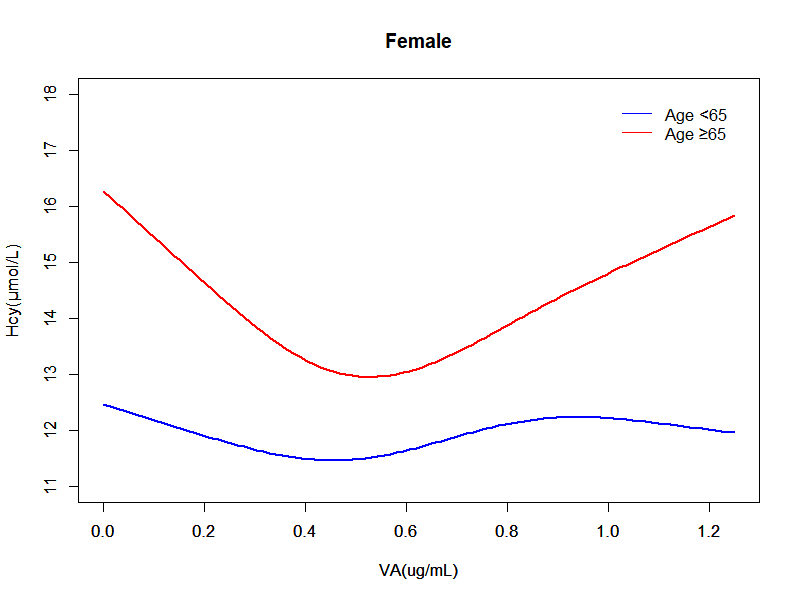

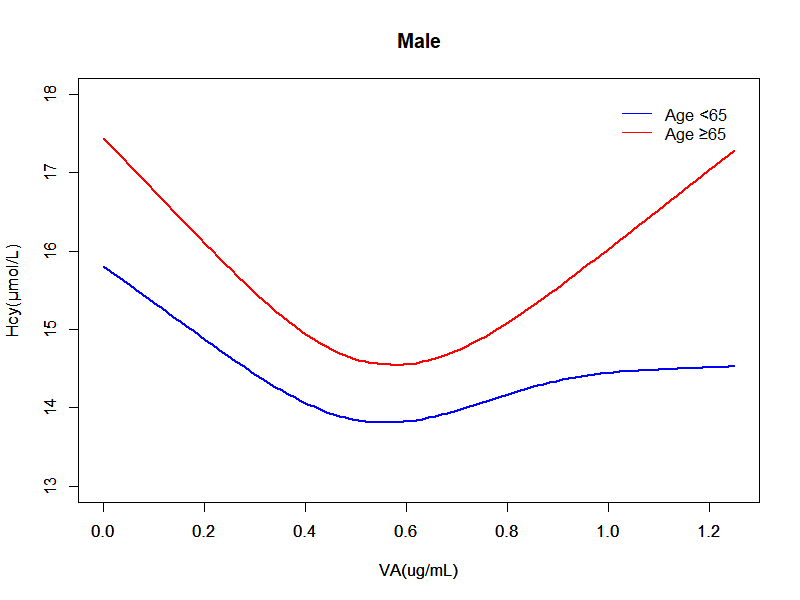


**Figure 3. Restricted spline curve for associations of plasma VA with the prevalence of hyperhomocysteinemia by age. P for nonlinear <0.001.**


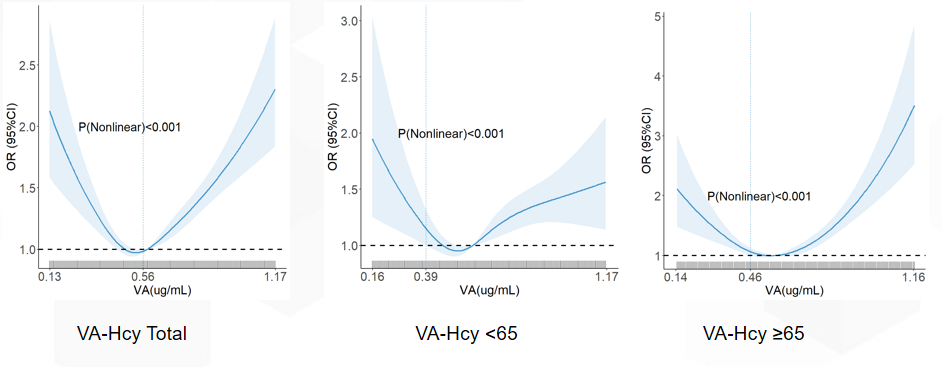


Variables adjusted for: age, sex, BMI, smoking, alcohol consumption, folate, vitamin B12, methyltransferase MTHFR C677T, hypertension, stroke, coronary artery disease.

**Figure 4. Restricted spline curve for associations of plasma VA with the prevalence of hyperhomocysteinemia by sex. P for nonlinear <0.001.**


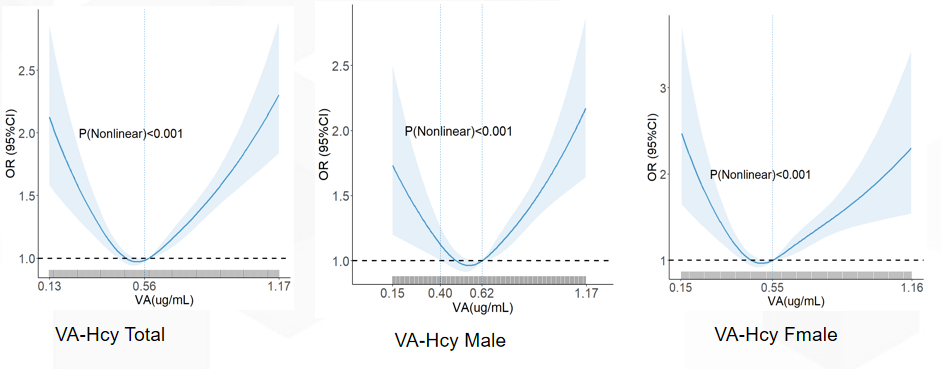


Variables adjusted for: age, sex, BMI, smoking, alcohol consumption, folate, vitamin B12, methyltransferase MTHFR C677T, hypertension, stroke, coronary artery disease.

**Figure 5. Forest plots on the association of plasma VA levels with the risk of hyperhomocysteinemia (adjusted OR and 95% CI), stratified by pertinent covariables（the second quintile of the dataset as the reference group).**


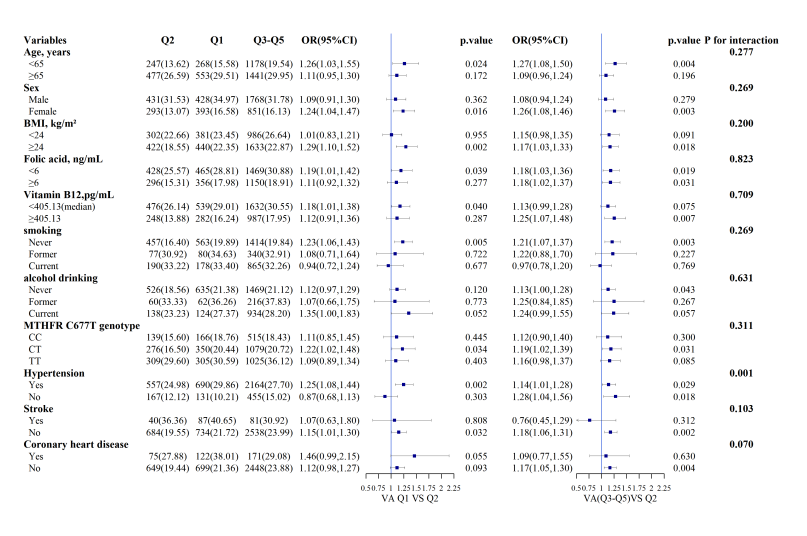


**Figure 6. Forest plots on the association of VA and HCY by potential effect modifiers in various subgroups divided by VA concentration of 0.514 ug/mL**


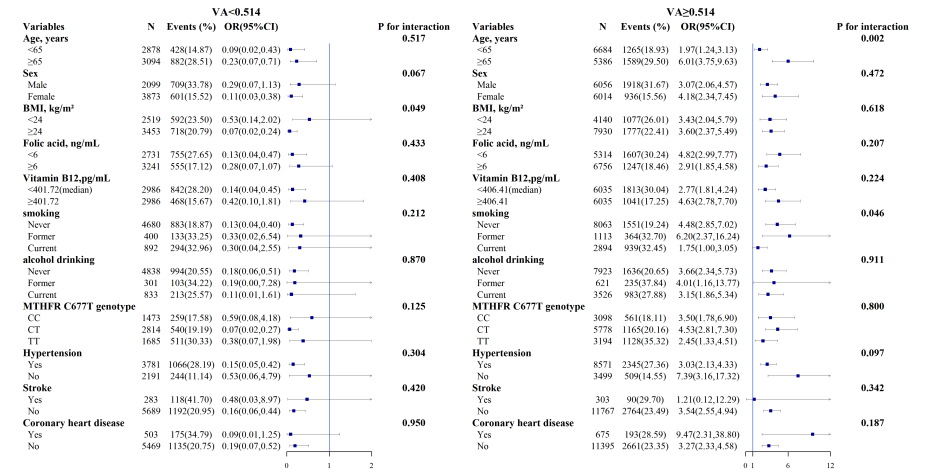

Supplement: Supplementary file 2 [file c21c0b43a44a0d54dba1ff52.docx]
