# Supplementary material for: China Precision Nutrition and Health: Knowledge, Attitude, and Practice Real-World Study (CPNAS): A Cross-Sectional Analysis of the Association Between Serum Vitamin A and Homocysteine Levels in Rural Middle-Aged and Elderly Populations in China
Source: Research Square preprint supplement (doi:10.21203/rs.3.rs-8023663/v1), 2025-12-12
Supplement: Supplementary file 1 [file 5192f19f3e7bdf1f4901fd57.docx]

**Table-Supplementary materials**

**Table 1.Basic characteristics of the study population based on different sexes and ages under vitamin A.**

For continuous variables, values are presented as mean±SD.

BMI, body mass index (kg/m2);Hcy, homocysteine(mg/dL);CHD,Coronary Heart Disease;C677T,Methylenetetrahydrofolate Reductase

|  | Variables | Level | Overall | Male | Age<65 | Age>65 | p.value | Female | Age<65 | Age>65 | p.value.1 |
| --- | --- | --- | --- | --- | --- | --- | --- | --- | --- | --- | --- |
|  | n |  | 18042 | 8155 | 3989 | 4166 |  | 9887 | 5573 | 4314 |  |
|  | BMI(mean(SD)) |  | 25.33(3.81) | 24.84(3.64) | 25.52(3.59) | 24.19(3.57) | <0.001 | 25.73(3.89) | 25.89(3.90) | 25.54(3.88) | <0.001 |
|  | smoke.new(%) | 1 | 12743(70.6) | 3103(38.1) | 1431(35.9) | 1672(40.1) | <0.001 | 9640(97.5) | 5469(98.1) | 4171(96.7) | <0.001 |
|  |  | 2 | 1513(8.4) | 1452(17.8) | 613(15.4) | 839(20.1) |  | 61(0.6) | 21(0.4) | 40(0.9) |  |
|  |  | 3 | 3786(21.0) | 3600(44.1) | 1945(48.8) | 1655(39.7) |  | 186(1.9) | 83(1.5) | 103(2.4) |  |
|  | alh.new(%) | 1 | 12761(70.7) | 3400(41.7) | 1536(38.5) | 1864(44.7) | <0.001 | 9361(94.7) | 5227(93.8) | 4134(95.8) | <0.001 |
|  |  | 2 | 922(5.1) | 806(9.9) | 346(8.7) | 460(11.0) |  | 116(1.2) | 71(1.3) | 45(1.0) |  |
|  |  | 3 | 4359(24.2) | 3949(48.4) | 2107(52.8) | 1842(44.2) |  | 410(4.1) | 275(4.9) | 135(3.1) |  |
|  | FA(mean(SD)) |  | 8.18(5.04) | 7.61(5.10) | 7.92(5.24) | 7.30(4.95) | <0.001 | 8.66(4.94) | 8.81(4.83) | 8.47(5.07) | 0.001 |
|  | B12(mean(SD)) |  | 439.09(185.66) | 426.05(186.98) | 426.63(183.48) | 425.49(190.30) | 0.784 | 449.85(183.87) | 454.97(182.44) | 443.24(185.52) | 0.002 |
|  | C677T(%) | CC | 4571(25.3) | 2155(26.4) | 1055(26.4) | 1100(26.4) | 0.295 | 2416(24.4) | 1356(24.3) | 1060(24.6) | 0.963 |
|  |  | CT | 8592(47.6) | 3934(48.2) | 1895(47.5) | 2039(48.9) |  | 4658(47.1) | 2629(47.2) | 2029(47.0) |  |
|  |  | TT | 4879(27.0) | 2066(25.3) | 1039(26.0) | 1027(24.7) |  | 2813(28.5) | 1588(28.5) | 1225(28.4) |  |
|  | hypertension(%) | 0 | 5690(31.5) | 2441(29.9) | 1152(28.9) | 1289(30.9) | 0.045 | 3249(32.9) | 2170(38.9) | 1079(25.0) | <0.001 |
|  |  | 1 | 12352(68.5) | 5714(70.1) | 2837(71.1) | 2877(69.1) |  | 6638(67.1) | 3403(61.1) | 3235(75.0) |  |
|  | Stroke(%) | 0 | 17456(96.8) | 7850(96.3) | 3862(96.8) | 3988(95.7) | 0.011 | 9606(97.2) | 5472(98.2) | 4134(95.8) | <0.001 |
|  |  | 1 | 586(3.2) | 305(3.7) | 127(3.2) | 178(4.3) |  | 281(2.8) | 101(1.8) | 180(4.2) |  |
|  | CHD(%) | 0 | 16864(93.5) | 7620(93.4) | 3792(95.1) | 3828(91.9) | <0.001 | 9244(93.5) | 5392(96.8) | 3852(89.3) | <0.001 |
|  |  | 1 | 1178(6.5) | 535(6.6) | 197(4.9) | 338(8.1) |  | 643(6.5) | 181(3.2) | 462(10.7) |  |
|  | VA(mean(SD)) |  | 0.60(0.17) | 0.64(0.18) | 0.67(0.19) | 0.61(0.18) | <0.001 | 0.57(0.15) | 0.57(0.16) | 0.56(0.15) | <0.001 |
|  | Hcy(mean(SD)) |  | 13.32(4.40) | 14.47(4.73) | 14.04(4.76) | 14.88(4.67) | <0.001 | 12.37(3.86) | 11.67(3.69) | 13.28(3.88) | <0.001 |

**Table2. Linear Regression analysis of Plasma VA in relation to Hcy (stratified by age)**

|  | **VA, μg/mL** | **N** | **Median.IQR.** | **Unadjusted** |  | **Model 1** |  | **Model 2** |  |
| --- | --- | --- | --- | --- | --- | --- | --- | --- | --- |
|  |  |  |  | **β (95%CI)** | **P_crude** | **β (95%CI)** | **P** | **β (95%CI)** | **P** |
| Total | Continuous | 18042 | 12.2(10.7-14.7) | 1.89(1.52,2.26) | <0.001 | 1.24(0.87,1.61) | <0.001 | 0.80(0.45,1.16) | <0.001 |
|  | Quintiles |  |  |  |  |  |  |  |  |
|  | Q1 (<0.5) | 3594 | 12(10.3-14.6) | 0.19(-0.01,0.39) | 0.065 | 0.25(0.05,0.44) | 0.013 | 0.21(0.02,0.39) | 0.028 |
|  | Q2 (0.5~0.5) | 3608 | 11.9(10.5-14.3) | -0.03(-0.23,0.17) | 0.768 | 0.01(-0.18,0.20) | 0.925 | 0.02(-0.17,0.20) | 0.87 |
|  | Q3 (0.5~0.6) | 3583 | 12(10.6-14.3) | ref |  | ref |  | ref |  |
|  | Q4 (0.6~0.7) | 3630 | 12.3(10.9-14.7) | 0.35(0.14,0.55) | <0.001 | 0.25(0.06,0.45) | 0.01 | 0.17(-0.01,0.35) | 0.07 |
|  | Q5 (≥0.7) | 3627 | 13(11.2-15.7) | 1.06(0.86,1.26) | <0.001 | 0.78(0.58,0.97) | <0.001 | 0.55(0.36,0.73) | <0.001 |
| **＜65** | **＜65** | 9562 | 11.7(10.3-13.9) | 2.98(2.49,3.47) | <0.001 | 1.31(0.81,1.81) | <0.001 | 0.78(0.31,1.25) | 0.001 |
|  | Quintiles |  |  |  |  |  |  |  |  |
|  | Q1 (<0.5)2 | 1910 | 11.1(9.5-13.3) | -0.32(-0.59,-0.05) | 0.021 | -0.02(-0.28,0.25) | 0.906 | -0.03(-0.28,0.21) | 0.789 |
|  | Q2 (0.5~0.6)1 | 1905 | 11.3(10.1-13.4) | -0.21(-0.48,0.07) | 0.14 | -0.10(-0.36,0.16) | 0.456 | -0.08(-0.32,0.17) | 0.539 |
|  | Q3 (0.6~0.6) | 1910 | 11.5(10.2-13.6) | ref |  | ref |  | ref |  |
|  | Q4 (0.6~0.8) | 1917 | 11.9(10.5-14.1) | 0.45(0.18,0.72) | 0.001 | 0.28(0.01,0.54) | 0.04 | 0.16(-0.08,0.41) | 0.193 |
|  | Q5 (≥0.8)1 | 1920 | 12.5(10.9-14.8) | 1.16(0.88,1.43) | <0.001 | 0.60(0.34,0.87) | <0.001 | 0.32(0.06,0.57) | 0.014 |
| **≥65** | **≥65** | 8480 | 12.9(11.3-15.6) | 1.39(0.84,1.95) | <0.001 | 1.06(0.50,1.62) | <0.001 | 0.82(0.28,1.35) | 0.003 |
|  | Quintiles |  |  |  |  |  |  |  |  |
|  | Q1 (<0.4)1 | 1696 | 12.9(11.2-15.8) | 0.44(0.15,0.73) | 0.003 | 0.45(0.16,0.74) | 0.002 | 0.42(0.15,0.69) | 0.003 |
|  | Q2 (0.4~0.5)1 | 1689 | 12.7(11.1-15.1) | 0.02(-0.27,0.31) | 0.9 | 0.07(-0.22,0.36) | 0.633 | 0.15(-0.12,0.42) | 0.28 |
|  | Q3 (0.5~0.6)2 | 1688 | 12.7(11.1-15.1) | ref |  | ref |  | ref |  |
|  | Q4 (0.6~0.7)2 | 1704 | 12.8(11.2-15.2) | 0.13(-0.16,0.42) | 0.377 | 0.13(-0.16,0.41) | 0.389 | 0.15(-0.13,0.42) | 0.291 |
|  | Q5 (≥0.7)2 | 1703 | 13.7(11.7-16.7) | 1.00(0.71,1.29) | <0.001 | 0.85(0.56,1.14) | <0.001 | 0.72(0.45,1.00) | <0.001 |
|  |  |  |  |  | <0.001 |  | <0.001 |  | <0.001 |

**Table 3. Linear Regression analysis of Plasma VA in relation to Hcy (stratified by sex)**

|  | **VA, μg/mL** | **N** | **Median.IQR.** | **Unadjusted** |  | **Model 1** |  | **Model 2** |  |
| --- | --- | --- | --- | --- | --- | --- | --- | --- | --- |
|  |  |  |  | **β (95%CI)** | **P_crude** | **β (95%CI)** | **P** | **β (95%CI)** | **P** |
| **Total** | **Continuous** | 18042 | 12.2(10.7-14.7) | 1.89(1.52,2.26) | <0.001 | 1.24(0.87,1.61) | <0.001 | 0.80(0.45,1.16) | <0.001 |
|  | Quintiles |  |  |  |  |  |  |  |  |
|  | Q1 (<0.5) | 3594 | 12(10.3-14.6) | 0.19(-0.01,0.39) | 0.065 | 0.25(0.05,0.44) | 0.013 | 0.21(0.02,0.39) | 0.028 |
|  | Q2 (0.5~0.5) | 3608 | 11.9(10.5-14.3) | -0.03(-0.23,0.17) | 0.768 | 0.01(-0.18,0.20) | 0.925 | 0.02(-0.17,0.20) | 0.87 |
|  | Q3 (0.5~0.6) | 3583 | 12(10.6-14.3) | ref |  | ref |  | ref |  |
|  | Q4 (0.6~0.7) | 3630 | 12.3(10.9-14.7) | 0.35(0.14,0.55) | <0.001 | 0.25(0.06,0.45) | 0.01 | 0.17(-0.01,0.35) | 0.07 |
|  | Q5 (≥0.7) | 3627 | 13(11.2-15.7) | 1.06(0.86,1.26) | <0.001 | 0.78(0.58,0.97) | <0.001 | 0.55(0.36,0.73) | <0.001 |
| **Male** | **Male** | 8155 | 13.3(11.4-16.1) | 0.33(-0.22,0.89) | 0.24 | 1.27(0.69,1.85) | <0.001 | 0.66(0.11,1.20) | 0.018 |
|  | Quintiles |  |  |  |  |  |  |  |  |
|  | Q1 (<0.5)1 | 1619 | 13.4(11.3-16.5) | 0.67(0.35,1.00) | <0.001 | 0.37(0.05,0.70) | 0.025 | 0.31(0.00,0.61) | 0.048 |
|  | Q2 (0.5~0.6) | 1637 | 13.1(11.3-15.8) | 0.28(-0.05,0.60) | 0.094 | 0.15(-0.17,0.47) | 0.364 | 0.12(-0.17,0.42) | 0.413 |
|  | Q3 (0.6~0.7) | 1629 | 12.9(11.3-15.3) | ref |  | ref |  | ref |  |
|  | Q4 (0.7~0.8) | 1634 | 13.2(11.5-15.9) | 0.20(-0.13,0.52) | 0.236 | 0.27(-0.05,0.59) | 0.097 | 0.05(-0.25,0.35) | 0.727 |
|  | Q5 (≥0.8) | 1636 | 13.8(11.7-16.8) | 0.89(0.56,1.21) | <0.001 | 1.07(0.75,1.40) | <0.001 | 0.72(0.42,1.03) | <0.001 |
| **Female** | **Female** | 9887 | 11.5(10.3-13.6) | 1.06(0.57,1.55) | <0.001 | 1.04(0.56,1.51) | <0.001 | 0.80(0.34,1.26) | <0.001 |
|  | Quintiles |  |  |  |  |  |  |  |  |
|  | Q1 (<0.4) | 1952 | 11.5(9.9-13.6) | 0.28(0.04,0.52) | 0.022 | 0.27(0.04,0.51) | 0.022 | 0.24(0.01,0.46) | 0.037 |
|  | Q2 (0.4~0.5) | 2003 | 11.3(10.2-13.4) | 0.03(-0.21,0.27) | 0.814 | 0.04(-0.19,0.27) | 0.722 | 0.07(-0.15,0.29) | 0.505 |
|  | Q3 (0.5~0.6)1 | 1957 | 11.4(10.2-13.3) | ref |  | ref |  | ref |  |
|  | Q4 (0.6~0.7)1 | 1987 | 11.6(10.4-13.5) | 0.20(-0.04,0.44) | 0.103 | 0.19(-0.04,0.42) | 0.105 | 0.22(-0.01,0.44) | 0.056 |
|  | Q5 (≥0.7)1 | 1988 | 11.9(10.6-14.1) | 0.75(0.51,0.99) | <0.001 | 0.71(0.48,0.95) | <0.001 | 0.57(0.34,0.79) | <0.001 |

**Table 4. Linear Regression Analysis of Plasma Vitamin A in Relation to Hcy (Stratified by sex and age)**

|  | **VA, μg/mL** | **N** | **Median.IQR.** | **Unadjusted** |  | **Model 1** |  | **Model 2** |  |
| --- | --- | --- | --- | --- | --- | --- | --- | --- | --- |
|  |  |  |  | **β (95%CI)** | **P_crude** | **β (95%CI)** | **P** | **β (95%CI)** | **P** |
| **Male** | **Male＜65** | 3989 | 12.8(11.1-15.4) | 0.86(0.06,1.65) | 0.035 | 1.15(0.33,1.97) | 0.006 | 0.53(-0.23,1.30) | 0.17 |
|  | Quintiles5 |  |  |  |  |  |  |  |  |
| **＜65** | Q1 (<0.5)3 | 798 | 12.6(10.9-15.4) | 0.29(-0.17,0.76) | 0.218 | 0.20(-0.27,0.66) | 0.413 | 0.08(-0.35,0.51) | 0.728 |
|  | Q2 (0.5~0.6)2 | 795 | 12.6(11-15) | 0.11(-0.36,0.57) | 0.651 | 0.07(-0.40,0.54) | 0.769 | 0.06(-0.37,0.48) | 0.798 |
|  | Q3 (0.6~0.7)1 | 800 | 12.7(11-15) | ref |  | ref |  | ref |  |
|  | Q4 (0.7~0.8)1 | 795 | 12.8(11.3-15.1) | 0.26(-0.21,0.72) | 0.28 | 0.30(-0.17,0.76) | 0.213 | 0.15(-0.28,0.58) | 0.495 |
|  | Q5 (≥0.8)2 | 801 | 13.4(11.5-16.3) | 0.91(0.44,1.37) | <0.001 | 0.96(0.50,1.43) | <0.001 | 0.55(0.11,0.98) | 0.014 |
| **Male** | **Male≥65** | 4166 | 13.7(11.8-16.6) | 0.65(-0.15,1.44) | 0.114 | 1.27(0.45,2.09) | 0.002 | 0.78(-0.00,1.55) | 0.05 |
|  | Quintiles6 |  |  |  |  |  |  |  |  |
| **≥65** | Q1 (<0.5)4 | 828 | 13.8(11.7-17.1) | 0.72(0.27,1.17) | 0.002 | 0.57(0.12,1.02) | 0.013 | 0.49(0.07,0.91) | 0.023 |
|  | Q2 (0.5~0.5)1 | 836 | 13.7(11.7-16.4) | 0.40(-0.05,0.84) | 0.082 | 0.32(-0.13,0.76) | 0.164 | 0.22(-0.19,0.64) | 0.297 |
|  | Q3 (0.5~0.6)3 | 831 | 13.2(11.6-15.9) | ref |  | ref |  | ref |  |
|  | Q4 (0.6~0.7)3 | 835 | 13.7(11.8-16.3) | 0.31(-0.14,0.76) | 0.177 | 0.39(-0.05,0.84) | 0.084 | 0.19(-0.22,0.61) | 0.361 |
|  | Q5 (≥0.7)3 | 836 | 14.4(12.2-17.3) | 1.00(0.56,1.45) | <0.001 | 1.16(0.71,1.61) | <0.001 | 0.80(0.37,1.22) | <0.001 |
| **Female** | **Female＜65** | 5573 | 11(9.8-12.8) | 1.63(1.01,2.25) | <0.001 | 1.54(0.91,2.17) | <0.001 | 1.01(0.42,1.61) | <0.001 |
|  | Quintiles7 |  |  |  |  |  |  |  |  |
| **＜65** | Q1 (<0.4)2 | 1112 | 10.7(9-12.6) | -0.07(-0.38,0.24) | 0.653 | -0.03(-0.34,0.27) | 0.83 | -0.06(-0.34,0.23) | 0.694 |
|  | Q2 (0.4~0.5)2 | 1113 | 10.8(9.6-12.5) | -0.00(-0.31,0.30) | 0.978 | 0.01(-0.30,0.32) | 0.953 | 0.01(-0.28,0.29) | 0.956 |
|  | Q3 (0.5~0.6)4 | 1112 | 10.9(9.8-12.5) | ref |  | ref |  | ref |  |
|  | Q4 (0.6~0.7)4 | 1121 | 11.2(10.1-12.8) | 0.28(-0.02,0.59) | 0.072 | 0.28(-0.02,0.59) | 0.071 | 0.24(-0.04,0.53) | 0.092 |
|  | Q5 (≥0.7)4 | 1115 | 11.4(10.3-13.3) | 0.72(0.42,1.03) | <0.001 | 0.71(0.41,1.02) | <0.001 | 0.42(0.13,0.71) | 0.004 |
| **Female** | **Female≥65** | 4314 | 12.3(10.9-14.5) | 0.83(0.08,1.59) | 0.03 | 0.96(0.20,1.71) | 0.013 | 0.91(0.18,1.64) | 0.015 |
|  | Quintiles8 |  |  |  |  |  |  |  |  |
| **≥65** | Q1 (<0.4)3 | 859 | 12.3(10.8-14.9) | 0.62(0.26,0.99) | <0.001 | 0.56(0.19,0.92) | 0.003 | 0.52(0.17,0.87) | 0.004 |
|  | Q2 (0.4~0.5)3 | 855 | 12.1(10.8-14.2) | 0.15(-0.21,0.52) | 0.414 | 0.17(-0.20,0.53) | 0.369 | 0.22(-0.13,0.57) | 0.209 |
|  | Q3 (0.5~0.6)5 | 874 | 12.1(10.8-14.2) | ref |  | ref |  | ref |  |
|  | Q4 (0.6~0.7)5 | 862 | 12.2(10.8-14.1) | 0.13(-0.23,0.49) | 0.482 | 0.15(-0.21,0.52) | 0.41 | 0.23(-0.12,0.58) | 0.204 |
|  | Q5 (≥0.7)5 | 864 | 12.8(11.3-15.3) | 0.94(0.58,1.30) | <0.001 | 0.93(0.57,1.29) | <0.001 | 0.86(0.51,1.21) | <0.001 |

**Table 5. Logistic Regression Analysis of Plasma Vitamin A in Relation to Hyperhomocysteinemia (Stratified by age)**

|  | **VA, μg/mL** | **N** | **median.IQR.** | **Unadjusted** | | **Model 1** | | **Model 2** | |
| --- | --- | --- | --- | --- | --- | --- | --- | --- | --- |
|  | **OR(95%CI)** | **P** | **OR(95%CI)** | **P** | **OR(95%CI)** | **P** |
| Total | Total | 18042 | 4164(23.1) | 2.24(1.84,2.73) | <0.001 | 1.93(1.56,2.39) | <0.001 | 1.86(1.49,2.32) | <0.001 |
| Quintiles |  |  |  |  |  |  |  |  |
| Q1 (<0.5) | 3594 | 821(22.8) | 1.18(1.05,1.32) | 0.004 | 1.17(1.04,1.31) | 0.01 | 1.17(1.03,1.32) | 0.013 |
| Q2 (0.5~0.5) | 3608 | 724(20.1) | ref |  | ref |  | ref |  |
| Q3 (0.5~0.6) | 3583 | 735(20.5) | 1.03(0.92,1.15) | 0.637 | 1.02(0.91,1.15) | 0.714 | 1.03(0.91,1.16) | 0.675 |
| Q4 (0.6~0.7) | 3630 | 824(22.7) | 1.17(1.05,1.31) | 0.006 | 1.13(1.01,1.27) | 0.038 | 1.12(0.99,1.26) | 0.072 |
| Q5 (≥0.7) | 3627 | 1060(29.2) | 1.64(1.48,1.83) | <0.001 | 1.50(1.34,1.69) | <0.001 | 1.48(1.31,1.67) | <0.001 |
| Male | Male | 8155 | 2627(32.2) | 1.28(1.00,1.65) | 0.053 | 2.06(1.58,2.69) | <0.001 | 1.93(1.45,2.56) | <0.001 |
| Quintiles | |  |  |  |  |  |  |  |
| Q1 (<0.5)1 | 1619 | 554(34.2) | 1.17(1.01,1.35) | 0.04 | 1.07(0.92,1.24) | 0.403 | 1.07(0.92,1.26) | 0.371 |
| Q2 (0.5~0.6) | 1637 | 505(30.8) | ref |  | ref |  | ref |  |
| Q3 (0.6~0.7) | 1629 | 451(27.7) | 0.86(0.74,1.00) | 0.047 | 0.91(0.78,1.06) | 0.214 | 0.91(0.78,1.07) | 0.259 |
| Q4 (0.7~0.8) | 1634 | 509(31.2) | 1.01(0.87,1.18) | 0.852 | 1.12(0.96,1.30) | 0.152 | 1.09(0.93,1.27) | 0.296 |
| Q5 (≥0.8) | 1636 | 608(37.2) | 1.33(1.15,1.53) | <0.001 | 1.55(1.34,1.81) | <0.001 | 1.52(1.30,1.78) | <0.001 |
| Female | Female | 9887 | 1537(15.5) | 1.37(0.97,1.94) | 0.078 | 1.59(1.12,2.27) | 0.01 | 1.64(1.14,2.36) | 0.008 |
| Quintiles | |  |  |  |  |  |  |  |
| Q1 (<0.4) | 1952 | 339(17.4) | 1.35(1.13,1.60) | <0.001 | 1.28(1.07,1.53) | 0.006 | 1.25(1.04,1.50) | 0.017 |
| Q2 (0.4~0.5) | 2003 | 270(13.5) | ref |  | ref |  | ref |  |
| Q3 (0.5~0.6)1 | 1957 | 261(13.3) | 0.99(0.82,1.19) | 0.895 | 0.99(0.83,1.20) | 0.944 | 0.99(0.82,1.19) | 0.887 |
| Q4 (0.6~0.7)1 | 1987 | 302(15.2) | 1.15(0.96,1.37) | 0.122 | 1.17(0.98,1.41) | 0.08 | 1.19(0.99,1.43) | 0.068 |
| Q5 (≥0.7)1 | 1988 | 365(18.4) | 1.44(1.22,1.71) | <0.001 | 1.46(1.23,1.74) | <0.001 | 1.43(1.19,1.71) | <0.001 |

**Table 6. Logistic Regression Analysis of Plasma Vitamin A in Relation to Hyperhomocysteinemia (Stratified by sex)**

|  | **VA, μg/mL** | **N** | **median.IQR.** | **Unadjusted** |  | **Model 1** |  | **Model 2** |  |
| --- | --- | --- | --- | --- | --- | --- | --- | --- | --- |
|  |  |  |  | **OR(95%CI)** | **P** | **OR(95%CI)** | **P** | **OR(95%CI)** | **P** |
| **Total** | Continuous | 18042 | 4164(23.1) | 2.24(1.84,2.73) | <0.001 | 1.93(1.56,2.39) | <0.001 | 1.67(1.34,2.09) | <0.001 |
|  | Quintiles |  |  |  |  |  |  |  |  |
|  | Q1 (<0.5) | 3594 | 821(22.8) | 1.18(1.05,1.32) | 0.004 | 1.17(1.04,1.31) | 0.01 | 1.15(1.02,1.30) | 0.025 |
|  | Q2 (0.5~0.5) | 3608 | 724(20.1) | ref |  | ref |  | ref |  |
|  | Q3 (0.5~0.6) | 3583 | 735(20.5) | 1.03(0.92,1.15) | 0.637 | 1.02(0.91,1.15) | 0.714 | 1.02(0.91,1.16) | 0.698 |
|  | Q4 (0.6~0.7) | 3630 | 824(22.7) | 1.17(1.05,1.31) | 0.006 | 1.13(1.01,1.27) | 0.038 | 1.09(0.97,1.24) | 0.147 |
|  | Q5 (≥0.7) | 3627 | 1060(29.2) | 1.64(1.48,1.83) | <0.001 | 1.50(1.34,1.69) | <0.001 | 1.39(1.24,1.57) | <0.001 |
| **Male** | Male | 8155 | 2627(32.2) | 1.28(1.00,1.65) | 0.053 | 2.06(1.58,2.69) | <0.001 | 1.74(1.31,2.31) | <0.001 |
|  | Quintiles |  |  |  |  |  |  |  |  |
|  | Q1 (<0.5)1 | 1619 | 554(34.2) | 1.17(1.01,1.35) | 0.04 | 1.07(0.92,1.24) | 0.403 | 1.06(0.90,1.24) | 0.472 |
|  | Q2 (0.5~0.6) | 1637 | 505(30.8) | ref |  | ref |  | ref |  |
|  | Q3 (0.6~0.7) | 1629 | 451(27.7) | 0.86(0.74,1.00) | 0.047 | 0.91(0.78,1.06) | 0.214 | 0.91(0.78,1.07) | 0.277 |
|  | Q4 (0.7~0.8) | 1634 | 509(31.2) | 1.01(0.87,1.18) | 0.852 | 1.12(0.96,1.30) | 0.152 | 1.05(0.90,1.23) | 0.533 |
|  | Q5 (≥0.8) | 1636 | 608(37.2) | 1.33(1.15,1.53) | <0.001 | 1.55(1.34,1.81) | <0.001 | 1.43(1.22,1.68) | <0.001 |
| **Female** | Female | 9887 | 1537(15.5) | 1.37(0.97,1.94) | 0.078 | 1.59(1.12,2.27) | 0.01 | 1.50(1.04,2.16) | 0.03 |
|  | Quintiles |  |  |  |  |  |  |  |  |
|  | Q1 (<0.4) | 1952 | 339(17.4) | 1.35(1.13,1.60) | <0.001 | 1.28(1.07,1.53) | 0.006 | 1.23(1.03,1.48) | 0.026 |
|  | Q2 (0.4~0.5) | 2003 | 270(13.5) | ref |  | ref |  | ref |  |
|  | Q3 (0.5~0.6)1 | 1957 | 261(13.3) | 0.99(0.82,1.19) | 0.895 | 0.99(0.83,1.20) | 0.944 | 0.97(0.80,1.17) | 0.725 |
|  | Q4 (0.6~0.7)1 | 1987 | 302(15.2) | 1.15(0.96,1.37) | 0.122 | 1.17(0.98,1.41) | 0.08 | 1.17(0.97,1.41) | 0.1 |
|  | Q5 (≥0.7)1 | 1988 | 365(18.4) | 1.44(1.22,1.71) | <0.001 | 1.46(1.23,1.74) | <0.001 | 1.35(1.13,1.62) | 0.001 |

**Table 7. Logistic regression analysis of plasma VA in relation to hyperhomocysteinemia (stratified by sex and age)**

|  | **VA, μg/mL** | **N** | **median.IQR.** | **Unadjusted** | | Model 1 | | Model 2 | |
| --- | --- | --- | --- | --- | --- | --- | --- | --- | --- |
|  | **OR(95%CI)** | **P** | **OR(95%CI)** | **P** | **OR(95%CI)** | **P** |
| **Male** | **Male**＜**65** | 3989 | 1084(27.2) | 1.62(1.11,2.35) | 0.012 | 1.84(1.25,2.71) | 0.002 | 1.55(1.02,2.35) | 0.04 |
|  | Quintiles |  |  |  |  |  |  |  |  |
| ＜**65** | Q1 (<0.5)3 | 798 | 214(26.8) | 1.10(0.88,1.38) | 0.384 | 1.07(0.85,1.34) | 0.566 | 1.03(0.81,1.31) | 0.807 |
|  | Q2(0.5~0.6)2 | 795 | 198(24.9) | ref |  | ref |  | ref |  |
|  | Q3(0.6~0.7)1 | 800 | 201(25.1) | 1.01(0.81,1.27) | 0.919 | 1.02(0.82,1.29) | 0.841 | 1.04(0.82,1.33) | 0.731 |
|  | Q4(0.7~0.8)1 | 795 | 202(25.4) | 1.03(0.82,1.29) | 0.817 | 1.06(0.84,1.33) | 0.626 | 1.02(0.79,1.30) | 0.899 |
|  | Q5 (≥0.8)2 | 801 | 269(33.6) | 1.52(1.23,1.90) | <0.001 | 1.58(1.27,1.98) | <0.001 | 1.42(1.12,1.81) | 0.004 |
| **Male** | **Male≥65** | 4166 | 1543(37.0) | 1.62(1.14,2.30) | 0.008 | 2.03(1.41,2.93) | <0.001 | 1.82(1.24,2.68) | 0.002 |
|  | Quintiles |  |  |  |  |  |  |  |  |
| **≥65** | Q1 (<0.5)4 | 828 | 311(37.6) | 1.05(0.86,1.28) | 0.649 | 1.02(0.84,1.25) | 0.828 | 1.02(0.83,1.26) | 0.826 |
|  | Q2(0.5~0.5)1 | 836 | 305(36.5) | ref |  | ref |  | ref |  |
|  | Q3(0.5~0.6)3 | 831 | 268(32.3) | 0.83(0.68,1.01) | 0.069 | 0.85(0.69,1.04) | 0.121 | 0.88(0.71,1.09) | 0.227 |
|  | Q4(0.6~0.7)3 | 835 | 295(35.3) | 0.95(0.78,1.16) | 0.623 | 1.01(0.82,1.23) | 0.958 | 0.97(0.79,1.20) | 0.801 |
|  | Q5 (≥0.7)3 | 836 | 364(43.5) | 1.34(1.10,1.63) | 0.003 | 1.46(1.20,1.79) | <0.001 | 1.36(1.10,1.69) | 0.004 |
| **Female** | **Female**＜**65** | 5573 | 609(10.9) | 1.45(0.85,2.48) | 0.17 | 1.39(0.81,2.38) | 0.226 | 1.22(0.70,2.15) | 0.481 |
|  | Quintiles |  |  |  |  |  |  |  |  |
| ＜**65** | Q1 (<0.4)2 | 1112 | 125(11.2) | 1.31(0.99,1.73) | 0.056 | 1.32(1.00,1.74) | 0.054 | 1.28(0.96,1.72) | 0.093 |
|  | Q2(0.4~0.5)2 | 1113 | 98(8.8) | ref |  | ref |  | ref |  |
|  | Q3(0.5~0.6)4 | 1112 | 113(10.2) | 1.17(0.88,1.56) | 0.275 | 1.17(0.88,1.56) | 0.274 | 1.21(0.90,1.62) | 0.217 |
|  | Q4(0.6~0.7)4 | 1121 | 130(11.6) | 1.36(1.03,1.79) | 0.03 | 1.36(1.03,1.79) | 0.029 | 1.35(1.01,1.80) | 0.044 |
|  | Q5 (≥0.7)4 | 1115 | 143(12.8) | 1.52(1.16,2.00) | 0.002 | 1.50(1.14,1.97) | 0.003 | 1.37(1.03,1.82) | 0.032 |
| **Female** | **Female≥65** | 4314 | 928(21.5) | 1.61(1.01,2.57) | 0.046 | 1.82(1.14,2.91) | 0.013 | 1.79(1.11,2.90) | 0.018 |
|  | Quintiles |  |  |  |  |  |  |  |  |
| **≥65** | Q1 (<0.4)3 | 859 | 212(24.7) | 1.39(1.10,1.75) | 0.005 | 1.31(1.04,1.65) | 0.023 | 1.26(0.99,1.61) | 0.056 |
|  | Q2(0.4~0.5)3 | 855 | 163(19.1) | ref |  | ref |  | ref |  |
|  | Q3(0.5~0.6)5 | 874 | 154(17.6) | 0.91(0.71,1.16) | 0.438 | 0.90(0.70,1.15) | 0.395 | 0.87(0.67,1.11) | 0.26 |
|  | Q4(0.6~0.7)5 | 862 | 171(19.8) | 1.05(0.83,1.33) | 0.686 | 1.06(0.83,1.35) | 0.628 | 1.07(0.84,1.37) | 0.597 |
|  | Q5 (≥0.7)5 | 864 | 228(26.4) | 1.52(1.21,1.91) | <0.001 | 1.51(1.20,1.91) | <0.001 | 1.43(1.13,1.81) | 0.003 |
|  |  |  |  |  |  |  |  |  |  |

**Table 8 .Logistic regression analysis of plasma VA in relation to** **hyperhomocysteinemia（Combined Groups）**

| **VA, μg/mL** | **N** | **Event (%)** | **Unadjusted** | | **Model 1** | | **Model 2** | |
| --- | --- | --- | --- | --- | --- | --- | --- | --- |
| **OR.95.CI._crude** | **P_crude** | **OR.95.CI._adj** | **P_adj** | **OR.95.CI._adj.1** | **P_adj.1** |
| Continuous | 18042 | 4164(23.1) | 2.24(1.84,2.73) | <0.001 | 1.93(1.56,2.39) | <0.001 | 1.67(1.34,2.09) | <0.001 |
| Quintiles |  |  |  |  |  |  |  |  |
| Q1 (<0.5) | 3594 | 821(22.8) | 1.18(1.05,1.32) | 0.004 | 1.17(1.04,1.31) | 0.01 | 1.15(1.02,1.30) | 0.025 |
| Q2(0.5~0.5) | 3608 | 724(20.1) | ref |  | ref |  | ref |  |
| Q3(0.5~0.6) | 3583 | 735(20.5) | 1.03(0.92,1.15) | 0.637 | 1.02(0.91,1.15) | 0.714 | 1.02(0.91,1.16) | 0.698 |
| Q4(0.6~0.7) | 3630 | 824(22.7) | 1.17(1.05,1.31) | 0.006 | 1.13(1.01,1.27) | 0.038 | 1.09(0.97,1.24) | 0.147 |
| Q5 (≥0.7) | 3627 | 1060(29.2) | 1.64(1.48,1.83) | <0.001 | 1.50(1.34,1.69) | <0.001 | 1.39(1.24,1.57) | <0.001 |
| Categories |  |  |  |  |  |  |  |  |
| Q1 (<0.5) | 3594 | 821(22.8) | 1.18(1.05,1.32) | 0.004 | 1.17(1.04,1.32) | 0.008 | 1.15(1.02,1.30) | 0.023 |
| Q2(0.5~0.5) | 3608 | 724(20.1) | ref |  | ref |  | ref |  |
| Q3-Q5(≥0.5) | 10840 | 2619(24.2) | 1.27(1.16,1.39) | <0.001 | 1.21(1.09,1.33) | <0.001 | 1.16(1.05,1.28) | 0.004 |

**Table 9. Threshold effect analyses of plasms VA on the prevelence of hyperhomocysteinemia**

| **VA, μg/mL** | **Crude OR 95%IC** | **Crude P** | **Adj OR 95%IC** | **Adj P** |
| --- | --- | --- | --- | --- |
| A straight line effect: | 2.239 (1.838,2.729) | < 0.001 | 1.855 (1.485,2.318) | < 0.001 |
| **Fold points:** | **0.514 ug/ml** |  |  |  |
| < K segment effect 1: | 0.092 (0.049,0.172) | < 0.001 | 0.137 (0.069,0.272) | < 0.001 |
| >= Segment K effect 2: | 5.495 (4.242,7.119) | < 0.001 | 3.902 (2.921,5.213) | < 0.001 |
| Effect difference of 2 and 1: | 59.859 (27.591,129.866) | < 0.001 | 28.558 (12.284,66.392) | < 0.001 |
| Log-likelihood ratio test: | <0.001 |  | <0.001 |  |
